# Supplementary material
Source: MDPI journal article supplement (https://www.mdpi.com/2075-163X/13/2/145)
Supplement: s1 [file s1]

**Table S1.** sampling sites

|     | longitude | Latitude | Sampling type |
|-----|-----------|----------|---------------|
| S1  | 117.848   | 29.132   | Sediment      |
| S2  | 117.753   | 29.07    | Sediment      |
| S3  | 117.717   | 29.013   | Sediment      |
| S4  | 117.487   | 28.927   | Sediment      |
| S5  | 117.588   | 28.959   | Sediment      |
| S6  | 117.57    | 28.951   | Sediment      |
| S7  | 117.704   | 29.056   | Sediment      |
| S8  | 117.677   | 29.073   | Sediment      |
| S9  | 117.678   | 29.073   | Sediment      |
| S10 | 117.68    | 29.073   | Sediment      |

**Table S2.** Precision and accuracy of each method

|    | RSD % | Repeatability limit (mg/kg) | Reproducibility limit (mg/kg) | Relative error % | Detection Limit (mg/kg) |
|----|-------|-----------------------------|-------------------------------|------------------|-------------------------|
| Hg | 3.42  | 0.01                        | 0.01                          | 3.00             | 0.002                   |
| As | 4.44  | 3.03                        | 3.55                          | -0.70            | 0.01                    |
| Se | 3.92  | 0.03                        | 0.03                          | 0.90             | 0.1                     |
| Bi | 4.92  | 0.30                        | 0.49                          | -3.20            | 0.1                     |
| Sb | 7.69  | 0.36                        | 0.66                          | -1.80            | 1.0                     |

  

|    | RSD % | Repeatability limit (mg/kg) | Reproducibility limit(mg/kg) | Recovery rate% | Detection Limit (mg/kg) |
|----|-------|-----------------------------|------------------------------|----------------|-------------------------|
| V  | 24.00 | 7.80                        | 27.10                        | 102.00         | 4.0                     |
| Sr | 18.00 | 11.00                       | 6.60                         | 94.80          | 2.0                     |
| Ti | 21.00 | 0.20                        | 0.40                         | 87.90          | 50.0                    |
| Cr | 23.00 | 6.00                        | 21.00                        | 99.20          | 3.0                     |
| Mo | 17.00 | 0.10                        | 0.40                         | 96.90          | 0.1                     |
| Ni | 17.00 | 2.00                        | 11.00                        | 96.60          | 1.5                     |
| Zn | 10.00 | 8.00                        | 17.00                        | 94.50          | 2.0                     |
| Pb | 23.00 | 5.00                        | 25.00                        | 96.80          | 2.0                     |
| Cu | 21.00 | 2.00                        | 10.50                        | 96.40          | 1.2                     |

**Table S3.** Statistical analysis of pollution load index

| site    | Cf   |       |       |       |       | PLI   |
|---------|------|-------|-------|-------|-------|-------|
|         | Cr   | Pb    | As    | Cu    | Zn    |       |
| S1      | 1.65 | 3.15  | 8.46  | 30.00 | 5.70  | 5.96  |
| S2      | 1.58 | 11.56 | 10.23 | 32.22 | 23.14 | 10.69 |
| S3      | 1.24 | 35.29 | 61.69 | 74.67 | 36.10 | 23.56 |
| S4      | 2.84 | 1.30  | 1.30  | 8.20  | 0.99  | 2.08  |
| S5      | 2.52 | 0.86  | 0.97  | 3.53  | 0.68  | 1.38  |
| S6      | 2.13 | 1.75  | 2.96  | 57.33 | 2.08  | 4.21  |
| S7      | 0.05 | 0.54  | 1.18  | 12.84 | 0.43  | 0.70  |
| S8      | 2.02 | 1.17  | 1.98  | 3.00  | 1.22  | 1.77  |
| S9      | 1.05 | 0.34  | 0.85  | 6.16  | 0.27  | 0.87  |
| S10     | 1.85 | 1.06  | 0.99  | 0.86  | 1.13  | 1.14  |
| average | 1.69 | 5.70  | 9.06  | 22.88 | 7.17  |       |

**Table S4.** Pearson correlation (PC) coefficient matrix of all elements and magnetic parameters in the study area.

|                       | Cr    | Pb         | As         | Cu         | Zn         | Bi         | V      | Hg      | Au         | Mo      | Ni      | Sr          | Ti    | Sb         | Se         | Ag         |
|-----------------------|-------|------------|------------|------------|------------|------------|--------|---------|------------|---------|---------|-------------|-------|------------|------------|------------|
| IRM <sub>20mT</sub>   | 0.124 | -<br>0.107 | -<br>0.108 | 0.026      | 0.029      | -<br>0.166 | 0.564  | 0.657*  | -<br>0.239 | -0.292  | 0.302   | -0.595      | 0.257 | -<br>0.243 | 0.029      | -<br>0.196 |
| IRM <sub>200mT</sub>  | 0.211 | -<br>0.159 | -<br>0.155 | -<br>0.130 | -<br>0.059 | -<br>0.217 | 0.457  | 0.472   | -<br>0.249 | -0.408  | 0.108   | -.642*      | 0.264 | -<br>0.281 | -<br>0.176 | -<br>0.231 |
| IRM <sub>300mT</sub>  | 0.221 | -<br>0.166 | -<br>0.165 | -<br>0.143 | -<br>0.064 | -<br>0.226 | 0.445  | 0.456   | -<br>0.257 | -0.414  | 0.090   | -.651*      | 0.258 | -<br>0.289 | -<br>0.190 | -<br>0.239 |
| SIRM                  | 0.221 | -<br>0.185 | -<br>0.179 | -<br>0.162 | -<br>0.091 | -<br>0.241 | 0.430  | 0.452   | -<br>0.268 | -0.415  | 0.076   | -.638*      | 0.244 | -<br>0.302 | -<br>0.192 | -<br>0.253 |
| IRM <sub>-20mT</sub>  | 0.339 | -<br>0.302 | -<br>0.304 | -<br>0.425 | -<br>0.276 | -<br>0.348 | 0.126  | 0.005   | -<br>0.306 | -0.431  | -0.270  | -0.557      | 0.139 | -<br>0.367 | -<br>0.471 | -<br>0.330 |
| IRM <sub>-300mT</sub> | 0.231 | -<br>0.153 | -<br>0.151 | -<br>0.135 | -<br>0.055 | -<br>0.213 | 0.446  | 0.453   | -<br>0.242 | -0.418  | 0.092   | -.649*      | 0.267 | -<br>0.275 | -<br>0.199 | -<br>0.225 |
| ARM                   | 0.329 | -<br>0.180 | -<br>0.155 | 0.151      | -<br>0.114 | -<br>0.168 | 0.701* | 0.798** | -<br>0.243 | 0.098   | 0.613   | -0.511      | 0.321 | -<br>0.235 | 0.155      | -<br>0.219 |
| ARM/SIRM              | 0.296 | -<br>0.036 | -<br>0.014 | 0.424      | -<br>0.073 | 0.060      | 0.426  | 0.509   | -<br>0.012 | 0.775** | 0.829** | 0.202       | 0.154 | 0.047      | 0.441      | 0.000      |
| SOFT                  | 0.141 | -<br>0.111 | -<br>0.101 | -<br>0.026 | 0.003      | -<br>0.164 | 0.512  | 0.593   | -<br>0.218 | -0.356  | 0.220   | -0.595      | 0.261 | -<br>0.236 | -<br>0.045 | -<br>0.188 |
| HIRM                  | 0.226 | -<br>0.170 | -<br>0.165 | -<br>0.149 | -<br>0.073 | -<br>0.228 | 0.438  | 0.452   | -<br>0.255 | -0.417  | 0.084   | -<br>0.644* | 0.256 | -<br>0.289 | -<br>0.196 | -<br>0.239 |
| S-ratio               | 0.395 | 0.459      | 0.412      | 0.435      | 0.528      | 0.397      | 0.376  | 0.317   | 0.329      | -0.300  | 0.344   | -0.391      | 0.341 | 0.333      | -<br>0.175 | 0.376      |

\*\*. Correlation is significant at the 0.01 level (2-tailed).

\*. Correlation is significant at the 0.05 level (2-tailed).
